# Supplementary material for: Can administrative data be used to research health visiting in England? A completeness assessment of the Community Services Dataset
Source: PubMed Central journal article supplement — Int J Popul Data Sci. 2024 Jun 20;9(1):2385. doi: 10.23889/ijpds.v9i1.2385 (PMC11626512; doi:10.23889/ijpds.v9i1.2385), 2024-06-20

## Supplementary Appendices

Supplementary Appendix 1: Identifying the eligible cohort of children (A) and their health visiting contacts (B) in Community Services Dataset from April 2016 to March 2020

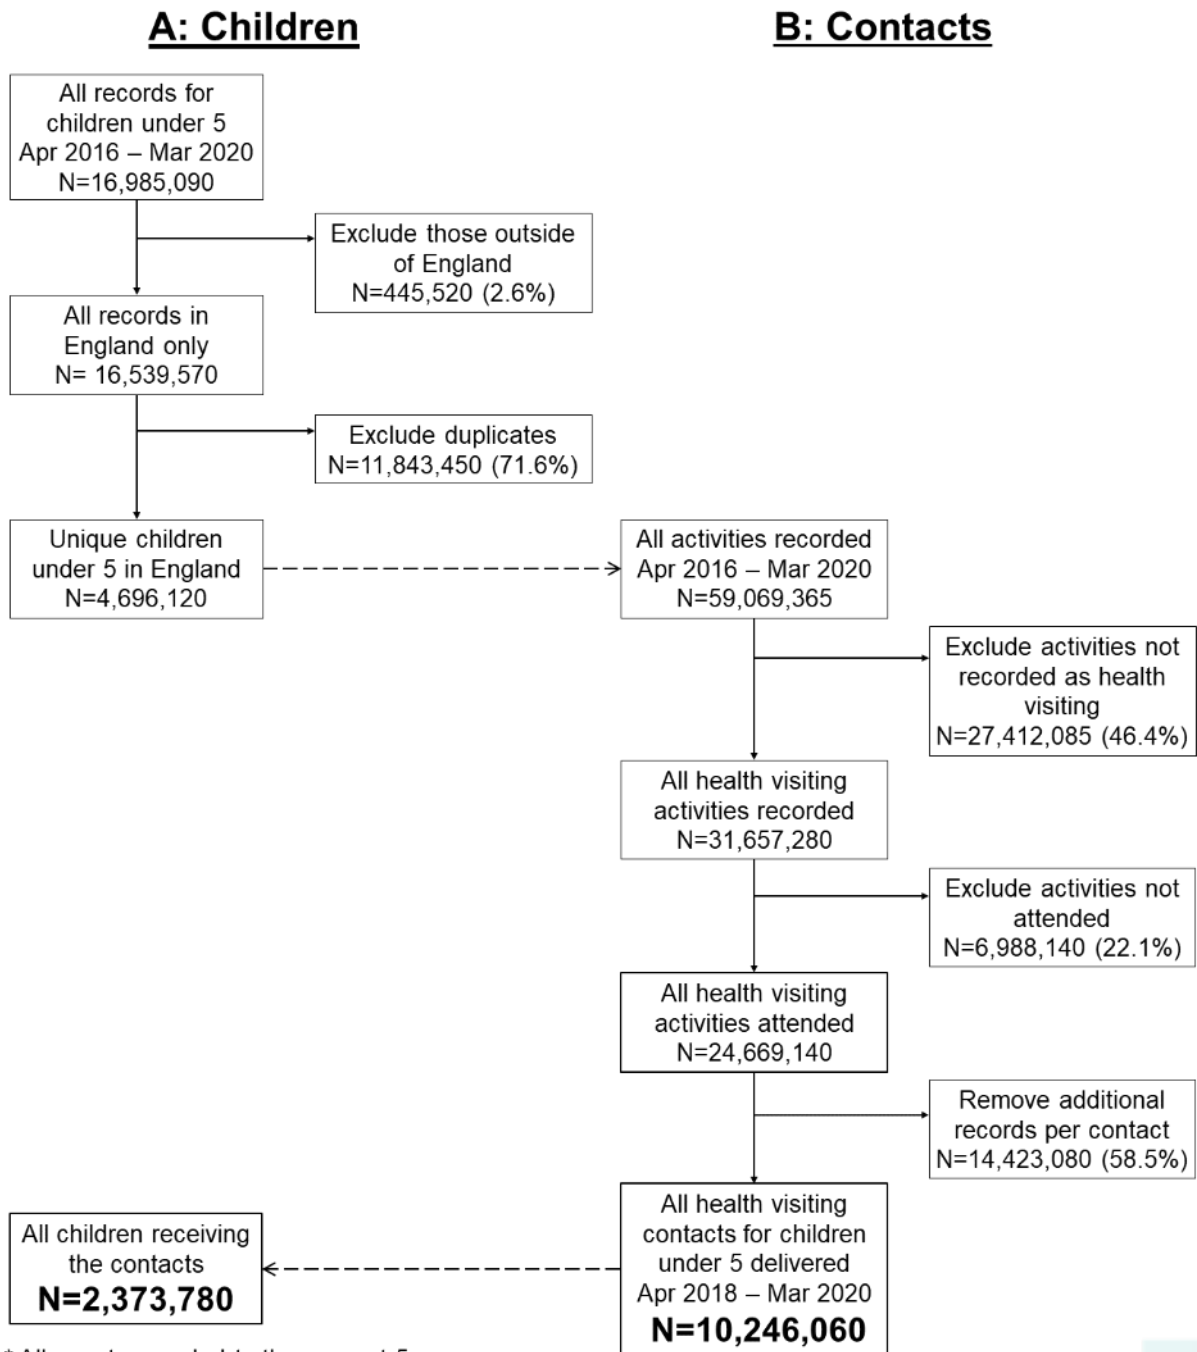

\* All counts rounded to the nearest 5

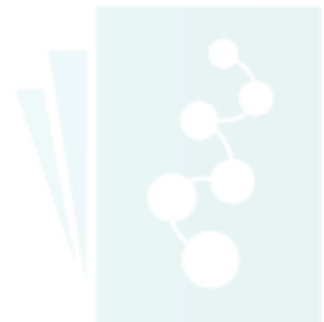

Supplementary Appendix 2: Proportion of LA-quarters and local authorities that were assessed as having complete health visiting data in Community Services Dataset between 2016/17 and 2019/20

| Year    | LA-quarters<br>(N = 596 per year) |       | Local authorities<br>(N = 149) |       |
|---------|-----------------------------------|-------|--------------------------------|-------|
|         | n                                 | %     | n                              | %     |
| 2016/17 | 24                                | 4.0%  | 11                             | 7.4%  |
| 2017/18 | 49                                | 8.2%  | 23                             | 15.4% |
| 2018/19 | 75                                | 12.6% | 39                             | 26.2% |
| 2019/20 | 89                                | 14.9% | 43                             | 28.9% |
| Overall | 237                               | 9.9%  | 63                             | 42.3% |

LA = local authority. Complete data was defined as being within +/-15% of the reference Health Visitor Service Delivery Metrics for the specified local authority and quarter.

Supplementary Appendix 3: Missingness for key variables related to health visiting service delivery in Community Service Dataset for local authorities with complete data, 2016/17 to 2019/20

|                                                                   | Contacts with missing data |       | Range of missing data by LA |        | LAs with <20% missing data |        |
|-------------------------------------------------------------------|----------------------------|-------|-----------------------------|--------|----------------------------|--------|
|                                                                   | n                          | %     | Min                         | Max    | n                          | %      |
| <b>Contact characteristics</b>                                    |                            |       |                             |        |                            |        |
| Duration (minutes)                                                | 247,110                    | 9.3%  | 1.3%                        | 100.0% | 56                         | 88.9%  |
| Medium (e.g. face-to-face, phone)                                 | 177,420                    | 6.7%  | 2.5%                        | 99.9%  | 50                         | 79.4%  |
| Group therapy contact (yes/no)                                    | 416,420                    | 15.6% | 0.7%                        | 99.9%  | 49                         | 77.8%  |
| Person who was the subject of the contact (i.e. patient or proxy) | 86,905                     | 3.3%  | 1.0%                        | 100.0% | 55                         | 87.3%  |
| Location of face-to-face contacts                                 | 341,340                    | 16.3% | 0.5%                        | 99.9%  | 51                         | 81.0%  |
| Distance from home to contact location                            | 2,286,620                  | 85.7% | 0.0%                        | 99.1%  | 8                          | 12.7%  |
| <b>Staff and service characteristics</b>                          |                            |       |                             |        |                            |        |
| Staff type                                                        | 2,155,715                  | 80.8% | 0.0%                        | 97.8%  | 5                          | 7.9%   |
| Registration body                                                 | 2,151,355                  | 80.7% | 0.0%                        | 90.4%  | 4                          | 6.3%   |
| Occupation type                                                   | 2,599,445                  | 97.5% | 0.0%                        | 89.2%  | 1                          | 1.6%   |
| Job role                                                          | 2,115,880                  | 79.3% | 0.1%                        | 89.4%  | 5                          | 7.9%   |
| Provider organisation code                                        | 0                          | 0.0%  | n/a                         | n/a    | 63                         | 100.0% |
| Commissioner organisation code                                    | 25,700                     | 1.0%  | 6.0%                        | 100.0% | 61                         | 96.8%  |

LA = local authority. N = 2,666,845 for contacts; 2,096,650 for face-to-face-contacts; 63 for local authorities.

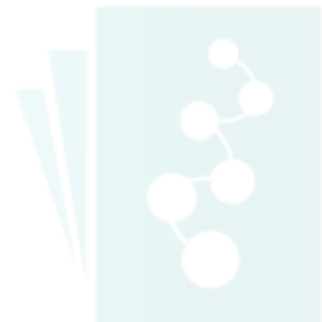

Supplement: ijpds-09-2385-s001.pdf [file ijpds-09-2385-s001.pdf]
